# Supplementary material
Source: MDPI journal article supplement (https://www.mdpi.com/2073-4433/14/5/858)
Supplement: s1 [file s1]

# Supplementary Materials: Projecting Bioclimatic Change over the South-Eastern European Agricultural and Natural Areas via Ultrahigh-Resolution Analysis of the de Martonne Index

Ioannis Charalampopoulos \*, Fotoula Droulia and Ioannis X. Tsiros

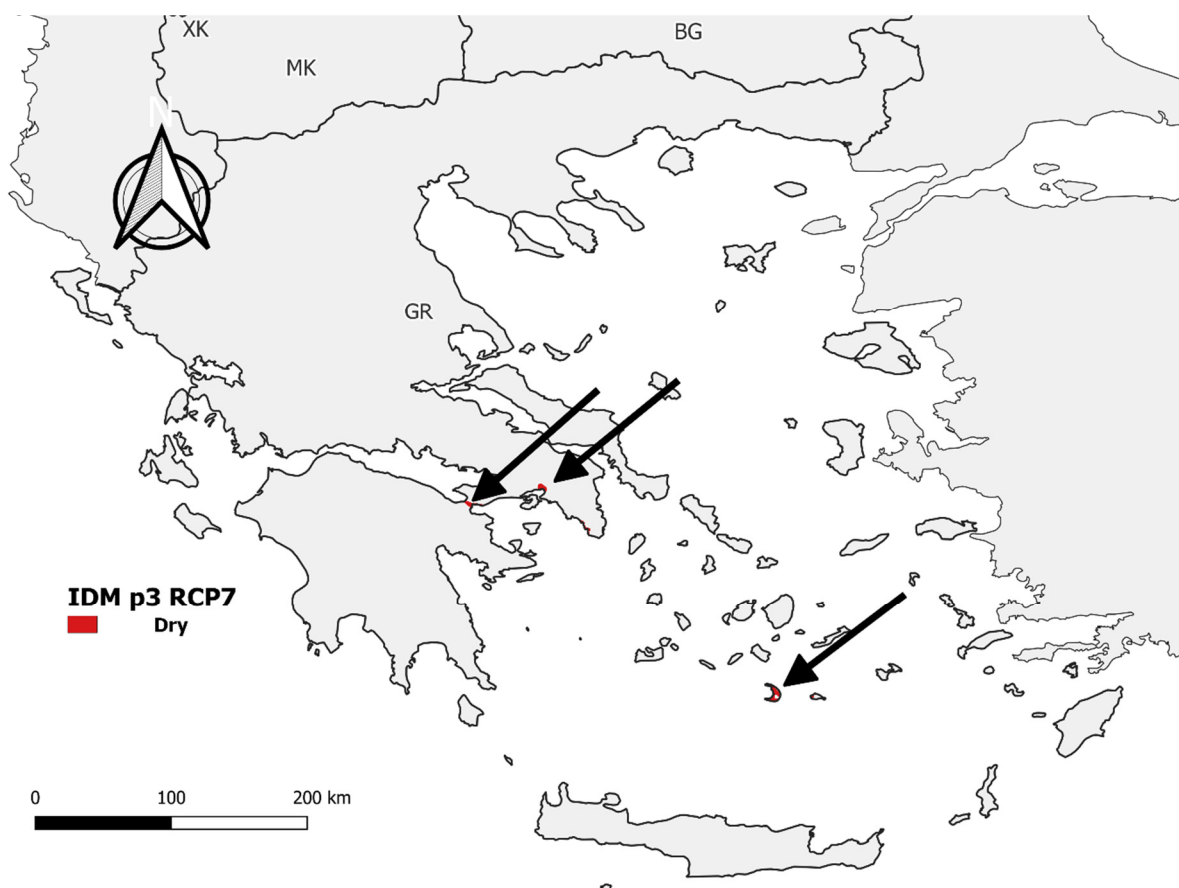

**Figure S1.** The dry IDM class at p3 under the RCP7 scenario.

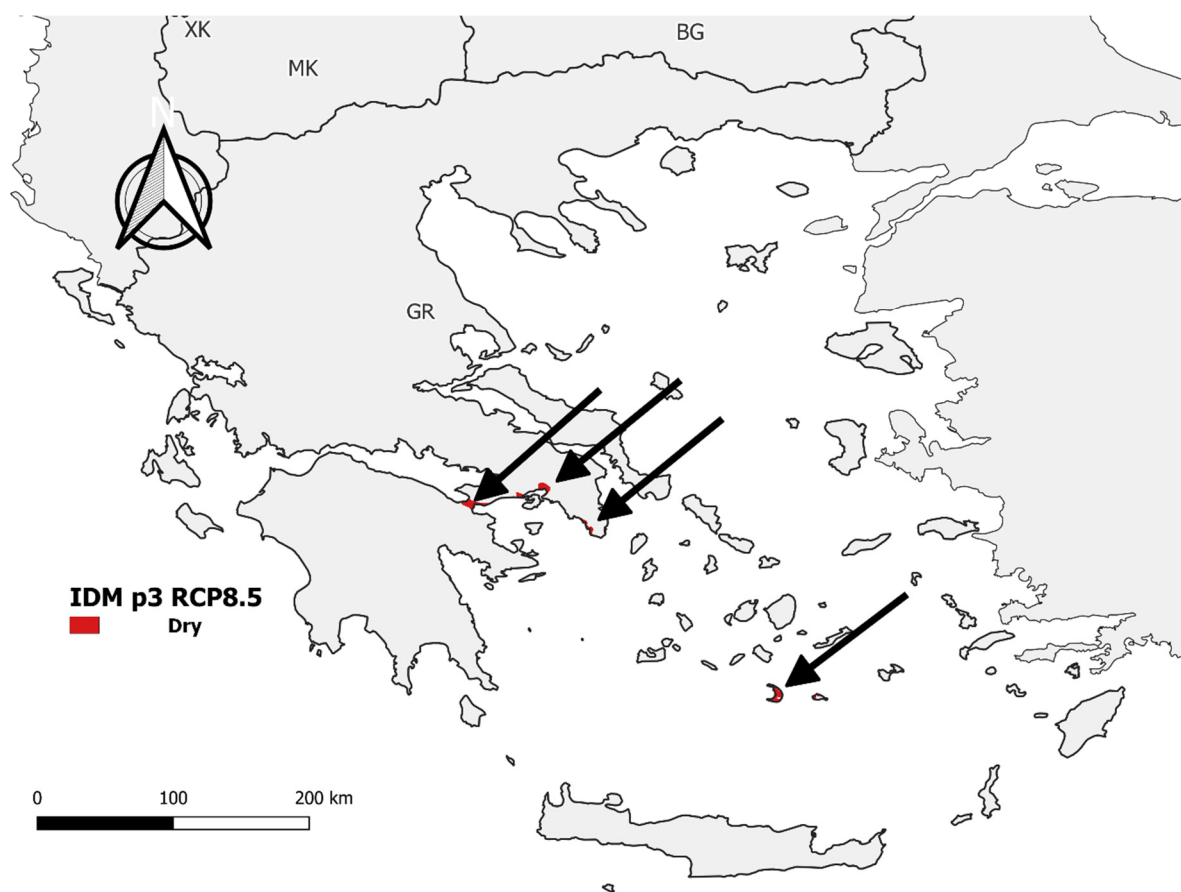

Figure S2. The dry IDM class at p3 under the RCP8.5 scenario.
